# Supplementary material for: Direct Sensing of 5-Methylcytosine by Polymerase Chain Reaction
Source: PubMed Central journal article supplement (PMC4499253; doi:10.1002/anie.201403745), 2014-06-12
Supplement: anie0053-8154-sd1.pdf [file anie0053-8154-sd1.pdf]

Supporting Information

© Wiley-VCH 2014

69451 Weinheim, Germany

**Direct Sensing of 5-Methylcytosine by Polymerase Chain Reaction\*\***

*Joos Aschenbrenner, Matthias Drum, Hüsnü Topal, Markus Wieland, and Andreas Marx\**

anie\_201403745\_sm\_miscellaneous\_information.pdf

# Supporting Information

## Table of Contents:

|                                                                                                                                                                   |   |
|-------------------------------------------------------------------------------------------------------------------------------------------------------------------|---|
| Methods.....                                                                                                                                                      | 1 |
| Supplementary Data .....                                                                                                                                          | 3 |
| Figure S1. Steady state Kinetic experiments with matched or A-mismatched primers and KlenTaq wild-type.....                                                       | 3 |
| Figure S2. Steady state Kinetic experiments with matched primers and KOD wild-type or KOD G498M .....                                                             | 4 |
| Figure S3. Primer design for PCR experiments on HeLa gDNA. ....                                                                                                   | 5 |
| Table S1. Steady state kinetic analysis of nucleotide incorporation next to matched/mismatched C and 5mC by KlenTaq wild-type, KOD exo- wild-type and G498M. .... | 6 |
| References .....                                                                                                                                                  | 7 |

## Methods

**Proteins, oligonucleotides and HeLa gDNA.** Protein mutation was performed using site directed mutagenesis. Protein expression and purification was performed as described.<sup>21, 22</sup>. Purity of enzymes was validated by SDS-PAGE. Oligonucleotides were purchased from Biomers and Metabion and used directly for PCR experiments or purified by preparative denaturing PAGE. Radioactive labeling of primer strands was performed using [ $\gamma$ -<sup>32</sup>P]-ATP and T4 polynucleotide kinase according to the vendors protocol. HeLa genomic DNA (gDNA) and CpG methylated HeLa gDNA was purchased from New England Biolabs and directly used for PCR.

**Primer extension assay.** The reaction mixture contained 150 nM of a [ $\gamma$ -<sup>32</sup>P]-labeled primer (5'-d(GTT TCT CCA GTT TCT TTT CTC N)-3', N = A/C/G/T), 225 nM of either template (5'-d-(GAG GTA GXG AGA AAA GAA ACT GGA GAA ACT CGG TG), X = C/5mC) and 25 nM of the respective DNA polymerase (KlenTaq, KOD exo- wild-type or KOD G498M) in buffer (50 mM Tris HCl pH 9.2, 16 mM (NH<sub>4</sub>)<sub>2</sub>SO<sub>4</sub>, 1.75 mM MgCl<sub>2</sub>, 0.1% Tween 20). Reaction mixtures (20  $\mu$ l, respectively) were heated to 95°C for 2 min and subsequently cooled to 55°C. After starting the primer extension by addition of 100  $\mu$ M dCTP for single nucleotide incorporation or 100  $\mu$ M of each dNTP for full length primer extension, reactions were allowed to proceed at 55°C for the desired incubation time (see legends of Fig. 1 and 3). Reactions were stopped by addition of 40  $\mu$ l stop solution (80% (v/v) formamide, 20 mM EDTA, 0.25% (w/v) bromophenol blue, 0.25% (w/v) xylene cyanol) and analyzed by 12% denaturing PAGE. Visualization was performed by phosphorimaging.

**Enzyme kinetics.** Steady state kinetics of KOD exo- wild-type and KOD G498M with matched and 3'-mismatched primers were measured under single completed hit conditions<sup>23</sup>. Single nucleotide incorporation for the respective primer in complex with either template (as above) was performed as described, analyzed via 12% denaturing PAGE and visualized by phosphorimaging. DNA polymerase concentrations were chosen so that not more than 20% of the applied primer was extended. The rate of single nucleotide incorporation was determined for various incubation times (10s – 60s) at various dCTP concentrations. The amount of extended primer was plotted against incubation time for each examined dCTP concentration. Linear regression delivered reaction velocities for the respective dCTP concentration. For kinetic analysis, the reaction velocities were normalized against enzyme concentrations and plotted against the employed dCTP concentrations. Using GraphPad Prism 4, experimental data was fit to a hyperbolic equation  $[\text{velocity}] = k_{\text{cat}} * [\text{dCTP}] / (K_M + [\text{dCTP}])$  to determine  $K_M$  and  $k_{\text{cat}}$ .

**PCR experiments.** Reaction mixtures for PCR contained 200  $\mu\text{M}$  dNTPs (each), 50 nM forward primer (5'-d(CTT GGT GAG ACT GGT AGA CN)-3', N = A/G), 100 nM reverse primer (5'-d(TTA GAC CCA CCC CTC CTG GCG)-3'), 150 nM KOD G498M, 1x sybr green I (Sigma) and 2 ng/ $\mu\text{l}$  of either HeLa gDNA or CpG methylated HeLa gDNA in buffer (50 mM Tris pH 8, 16 mM  $(\text{NH}_4)_2\text{SO}_4$ , 30 mM NaCl, 1.5 mM  $\text{MgCl}_2$  and 0.1% Tween 20). Real time PCR data was gathered from respectively 25 $\mu\text{l}$  reaction mixture using the Roche LightCycler® 480 system with an initial denaturation at 95°C for 5 min followed by amplification over 60 cycles with denaturation at 95°C for 10s and annealing and elongation at 68°C for 30s. Melting curves were measured immediately after PCR amplification. Subsequently, reaction mixtures (10  $\mu\text{l}$  respectively) were analyzed using agarose gel electrophoresis and visualization by EtBr staining and UV irradiation.

## Supplementary Data

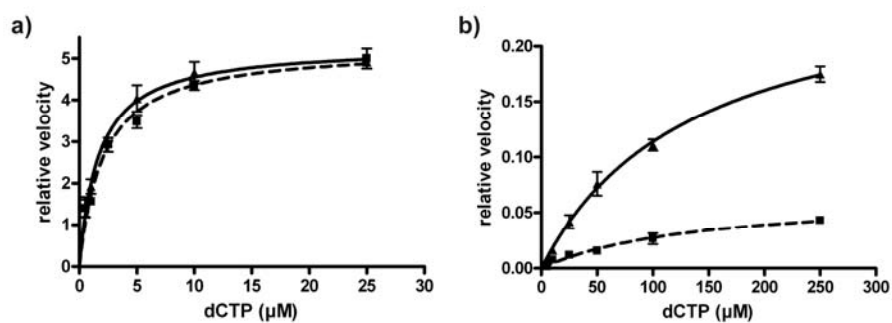

**Figure S1.** Steady state Kinetic experiments with matched or A-mismatched primers and KlenTaq wild-type. a,b) Steady state kinetics of single nucleotide incorporation next to matched (a) or A-mismatched (b) C (dashed) or 5mC (solid) catalyzed by KlenTaq.

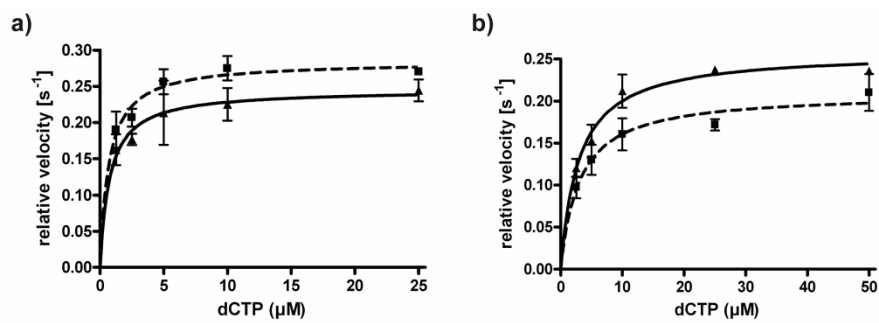

**Figure S2.** Steady state Kinetic experiments with matched primers and KOD wild-type or KOD G498M. a,b) Steady state kinetics of single nucleotide incorporation next to matched C (dashed) or 5mC (solid) catalyzed by KOD wildtype (a) and KOD G498M (b).



**Table S1.** Steady state kinetic analysis of nucleotide incorporation next to matched/mismatched C and 5mC by KlenTaq wild-type, KOD exo- wild-type and G498M.

| DNA polymerase     | 3' nucleotide of primer | template | $k_{cat}^{[a]}$ [ $s^{-1} \times 10^{-2}$ ] | $K_M^{[a]}$ [ $\mu M$ ] |
|--------------------|-------------------------|----------|---------------------------------------------|-------------------------|
| KlenTaq wild-type  | G                       | C        | 528 $\pm$ 26                                | 2.10 $\pm$ 0.37         |
| KlenTaq wild-type  | G                       | 5mC      | 531 $\pm$ 16                                | 1.69 $\pm$ 0.18         |
| KlenTaq wild-type  | A                       | C        | 6.63 $\pm$ 0.84                             | 140 $\pm$ 11            |
| KlenTaq wild-type  | A                       | 5mC      | 26.9 $\pm$ 1.1                              | 136 $\pm$ 35            |
| KOD exo- wild-type | G                       | C        | 28.4 $\pm$ 1.0                              | 0.692 $\pm$ 0.152       |
| KOD exo- wild-type | G                       | 5mC      | 24.5 $\pm$ 0.8                              | 0.749 $\pm$ 0.144       |
| KOD exo- wild-type | A                       | C        | 8.95 $\pm$ 0.21                             | 44.3 $\pm$ 3.1          |
| KOD exo- wild-type | A                       | 5mC      | 10.7 $\pm$ 0.4                              | 13.5 $\pm$ 2.2          |
| KOD exo- G498M     | G                       | C        | 21.0 $\pm$ 1.1                              | 3.06 $\pm$ 0.50         |
| KOD exo- G498M     | G                       | 5mC      | 25.9 $\pm$ 1.0                              | 2.93 $\pm$ 0.67         |
| KOD exo- G498M     | A                       | C        | 2.91 $\pm$ 0.23                             | 462 $\pm$ 75            |
| KOD exo- G498M     | A                       | 5mC      | 6.39 $\pm$ 0.58                             | 401 $\pm$ 80            |

[a] Data points derive from triplicates.  $\pm$  describes SD.



## References

- [21] a) K. Betz, D. A. Malyshev, T. Lavergne, W. Welte, K. Diederichs, T. J. Dwyer, O. Phillip, F. E. Romesberg, A. Marx, *Nat. Chem. Biol.* **2012**, *8*, 612-614; b) K. Bergen, K. Betz, W. Welte, K. Diederichs, A. Marx, *ChemBioChem* **2013**, *14*, 1058-1062.
- [22] a) S. Obeid, N. Blatter, R. Kranaster, A. Schnur, K. Diederichs, W. Welte, A. Marx, *EMBO J.* **2010**, *29*, 1738-1747; b) K. Betz, F. Streckenbach, A. Schnur, T. Exner, W. Welte, K. Diederichs, A. Marx, *Angew. Chem. Int. Ed.* **2010**, *49*, 5181-5184.
- [23] a) M. S. Boosalis, J. Petruska, M. F. Goodman, *J. Biol. Chem.* **1987**, *262*, 14689-14696; b) S. Creighton, M. M. Huang, H. Cai, N. Arnheim, M. F. Goodman, *J. Biol. Chem.* **1992**, *267*, 2633-2639; c) J. Petruska, M. F. Goodman, M. S. Boosalis, L. C. Sowers, C. Cheong, I. Tinoco, *Proc. Natl. Acad. Sci. USA* **1988**, *85*, 6252-6256.
